# Supplementary material for: Clinicopathological, Radiological, and Molecular Features of Primary Lung Adenocarcinoma with Morule-Like Components
Source: PubMed Central journal article supplement (PMC8216805; doi:10.1155/2021/9186056), 2021-06-12
Supplement: 9186056.f1.pdf [file 9186056.f1.pdf]

## Supplementary figure

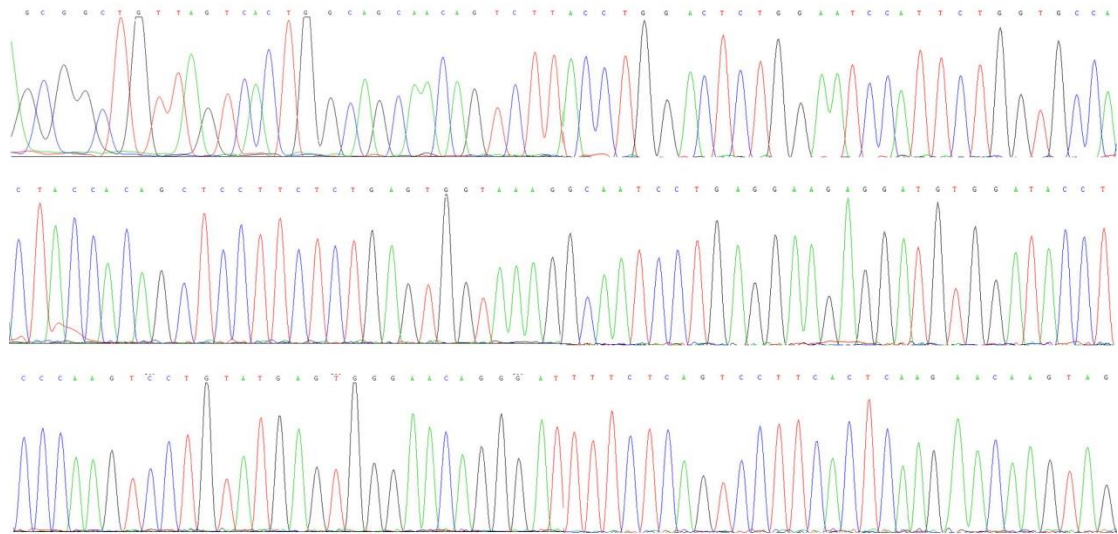

**FIGURE S1. The mutations of  $\beta$ -catenin gene in Exon 3. No  $\beta$ -catenin gene mutation in Exon 3 was detected in all patients.**
